# Supplementary material for: Influence of pH and Temperature on Struvite Purity and Recovery from Anaerobic Digestate
Source: MDPI journal article supplement (doi:10.3390/su131910730), 2021-09-27
Supplement: s1 [file s1]

## Supplementary material

Table S1. Characteristics of digested sludge supernatant (centrate) sampled from Esholt WWTW.

| Parameters                       | Units                   | Concentration |
|----------------------------------|-------------------------|---------------|
| NH <sub>4</sub> <sup>+</sup> -N  | mg N/L                  | 1,080         |
| TKN-N                            | mg N/L                  | 1,560         |
| K <sup>+</sup>                   | mg/L                    | 111           |
| Ca <sup>2+</sup>                 | mg/L                    | 92            |
| Mg <sup>2+</sup>                 | mg/L                    | 32            |
| PO <sub>4</sub> <sup>3-</sup> -P | mg P/L                  | 2.5           |
| TP                               | mg P/L                  | 12            |
| TSS                              | mg/L                    | 512           |
| VSS                              | mg/L                    | 324           |
| Alkalinity                       | mg CaCO <sub>3</sub> /L | 4,587         |
| Conductivity                     | mS/cm                   | 8.7           |
| pH                               | -                       | 7.8           |

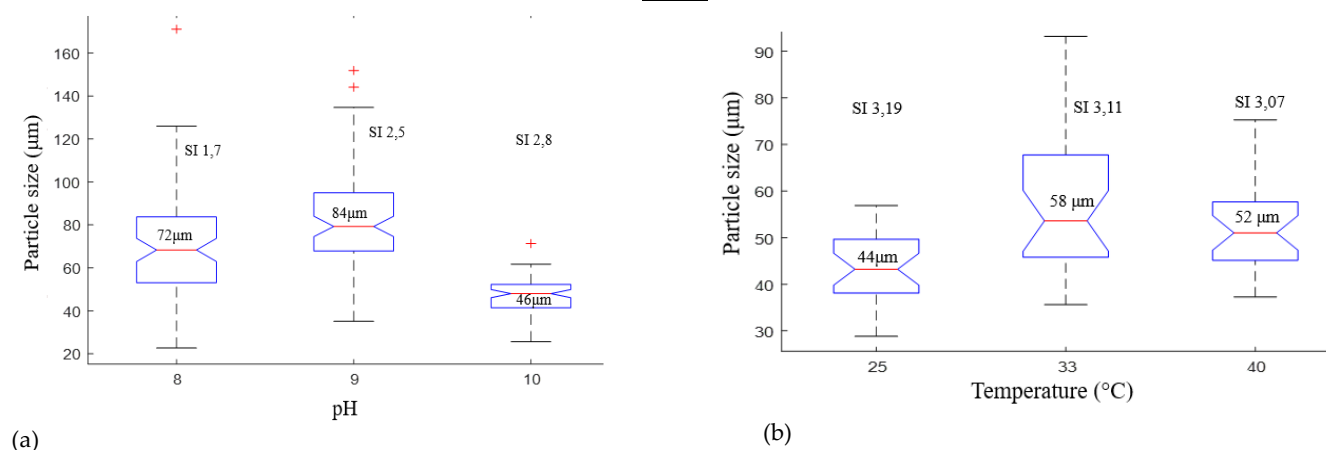

Figure S1. Effect of (a) pH, and (b) Temperature in the particle size of crystals.
